# Supplementary material for: Reconstruction and analysis of a genome-scale metabolic model for Eriocheir sinensis eyestalks
Source: Royal Society of Chemistry journal article supplement (doi:10.1039/c5mb00571j), 2015-11-06
Supplement: c5mb00571j1.zip [file c5mb00571j1.zip]

## Sheet: Sheet1
	ao-vs-a1 differentially expressed unigene	ao-vs-a1 expression profile	ao-vs-a2 differentially expressed unigene	ao-vs-a2 expression profile
R00941	Unigene8448_A0A	Down	Unigene8448_A0A	Up
R00924	Unigene54425_A0A	Down	Unigene54425_A0A	Up
R01252	Unigene9107_A0A	Down	Unigene9107_A0A	Up
R02757	Unigene18253_A0A	Down	Unigene18253_A0A	Up
R02222	Unigene20730_A0A	Down	Unigene20730_A0A	Up
R00527	Unigene46416_A0A	Down	Unigene46416_A0A	Up
R00236	Unigene45351_A0A	Down	Unigene45351_A0A	Up
R00197	Unigene1847_A0A	Down	Unigene1847_A0A	Up
R00192	Unigene19329_A0A	Down	Unigene19329_A0A	Up
R04378	Unigene34623_A0A	Up	Unigene34623_A0A	Down
R01561	Unigene20031_A0A	Down	Unigene20031_A0A	Up
R00497	Unigene40467_A0A	Down	Unigene40467_A0A	Up
R03236	Unigene8597_A0A	Down	Unigene8597_A0A	Up
R01055	Unigene10099_A0A	Up	Unigene10099_A0A	Up
R00698	Unigene20461_A0A	Down	Unigene20461_A0A	Up
R04144	Unigene32798_A0A	Up	Unigene32798_A0A	Up
R00669	Unigene3143_A0A	Down	Unigene3143_A0A	Up
R00678	Unigene10220_A0A	Down	Unigene10220_A0A	Up
R02535	Unigene23436_A0A	Down	Unigene23436_A0A	Down
R00181	Unigene7978_A0A	Down	Unigene7978_A0A	Up
R00184	Unigene27515_A0A	Down	Unigene27515_A0A	Up
R00158	Unigene7801_A0A	Down	Unigene7801_A0A	Up
R00173	Unigene34035_A0A	Down	Unigene34035_A0A	Down
R02251	Unigene26599_A0A	Down	Unigene26599_A0A	Up
R02038	Unigene44510_A0A	Down	Unigene44510_A0A	Up
R02035	Unigene53447_A0A	Down	Unigene53447_A0A	Up
R01814	Unigene3789_A0A	Down	Unigene3789_A0A	Down
R01827	Unigene7924_A0A	Down	Unigene7924_A0A	Up
R06983	Unigene49428_A0A	Down	Unigene49428_A0A	Up
R06941	Unigene8033_A0A	Down	Unigene8033_A0A	Up
R00428	Unigene7886_A0A	Down	Unigene7886_A0A	Up
R00416	Unigene50068_A0A	Down	Unigene50068_A0A	Up
R01093	Unigene18863_A0A	Down	Unigene18863_A0A	Up
R01074	Unigene33339_A0A	Down	Unigene33339_A0A	Up
R04188	Unigene9554_A0A	Down	Unigene9554_A0A	Up
R02245	Unigene18595_A0A	Down	Unigene18595_A0A	Down
R00891	Unigene49183_A0A	Down	Unigene49183_A0A	Up
R00878	Unigene7919_A0A	Down	Unigene7919_A0A	Up
R04435	Unigene35544_A0A	Down	Unigene35544_A0A	Up
R04463	Unigene33406_A0A	Down	Unigene33406_A0A	Down
R00122	Unigene33812_A0A	Down	Unigene33812_A0A	Up
R00127	Unigene2847_A0A	Down	Unigene2847_A0A	Up
R09085	Unigene52389_A0A	Down	Unigene52389_A0A	Down
R00369	Unigene10634_A0A	Up	Unigene10634_A0A	Up
R00367	Unigene1598_A0A	Down	Unigene1598_A0A	Down
R04983	Unigene29449_A0A	Down	Unigene29449_A0A	Up
R04858	Unigene43136_A0A	Down	Unigene43136_A0A	Up
R04856	Unigene34748_A0A	Down	Unigene34748_A0A	Down
R04666	Unigene40319_A0A	Down	Unigene40319_A0A	Up
R08969	Unigene17024_A0A	Down	Unigene17024_A0A	Up
R05924	Unigene8561_A0A	Down	Unigene8561_A0A	Up
R05922	Unigene37387_A0A	Up	Unigene37387_A0A	Down
R06519	Unigene25625_A0A	Down	Unigene25625_A0A	Up
R00615	Unigene35104_A0A	Down	Unigene35104_A0A	Up
R00616	Unigene47362_A0A	Down	Unigene47362_A0A	Up
R02082	Unigene3605_A0A	Down	Unigene3605_A0A	Up
R01468	Unigene20241_A0A	Down	Unigene20241_A0A	Up
R01811	Unigene14377_A0A	Down	Unigene14377_A0A	Up
R01890	Unigene26199_A0A	Down	Unigene26199_A0A	Up
R01132	Unigene5009_A0A	Down	Unigene5009_A0A	Down
R03409	Unigene26367_A0A	Down	Unigene26367_A0A	Up
R01134	Unigene40509_A0A	Down	Unigene40509_A0A	Up
R07761	Unigene17934_A0A	Down	Unigene17934_A0A	Up
R02640	Unigene40291_A0A	Down	Unigene40291_A0A	Up
R04230	Unigene37137_A0A	Down	Unigene37137_A0A	Down
R00829	Unigene45487_A0A	Down	Unigene45487_A0A	Up
R00751	Unigene37826_A0A	Down	Unigene37826_A0A	Up
R00966	Unigene24585_A0A	Down	Unigene24585_A0A	Up
R01201	Unigene2463_A0A	Down	Unigene2463_A0A	Up
R01221	Unigene34299_A0A	Down	Unigene34299_A0A	Up
R00277	Unigene44353_A0A	Down	Unigene44353_A0A	Up
R00269	Unigene30259_A0A	Down	Unigene30259_A0A	Up
R03055	Unigene49762_A0A	Down	Unigene49762_A0A	Up
R00554	Unigene26243_A0A	Down	Unigene26243_A0A	Up
R02094	Unigene10161_A0A	Down	Unigene10161_A0A	Up
R01430	Unigene16653_A0A	Down	Unigene16653_A0A	Up
R01378	Unigene13081_A0A	Down	Unigene13081_A0A	Up
R01394	Unigene53967_A0A	Down	Unigene53967_A0A	Up
R01402	Unigene55818_A0A	Down	Unigene55818_A0A	Up
R08193	Unigene43809_A0A	Down	Unigene43809_A0A	Up
R01030	Unigene11247_A0A	Down	Unigene11247_A0A	Up
R07380	Unigene24357_A0A	Down	Unigene24357_A0A	Up
R03815	Unigene46201_A0A	Down	Unigene46201_A0A	Up
R03905	Unigene6029_A0A	Down	Unigene6029_A0A	Up
R04311	Unigene37562_A0A	Down	Unigene37562_A0A	Up
R02530	CL1687.Contig1_A0A	Down	CL1687.Contig1_A0A	Up
R02487	Unigene49127_A0A	Down	Unigene49127_A0A	Up
R02363	Unigene49439_A0A	Down	Unigene49439_A0A	Up
R02335	Unigene28132_A0A	Down	Unigene28132_A0A	Up
